# Supplementary material for: CRISPRi-mediated suppression of E. coli Nissle 1917 virulence factors: A strategy for creating an engineered probiotic using csgD gene suppression
Source: PubMed Central journal article supplement (PMC9376613; doi:10.3389/fnut.2022.938989), 2022-08-01
Supplement: Data_Sheet_1.pdf [file Data_Sheet_1.pdf]

**CRISPRi-mediated suppression of *E. coli* Nissle 1917 virulence factors: A strategy for creating an engineered probiotic using *csgD* gene suppression**

**Mohd W. Azam, and Asad U Khan\***

Medical Microbiology and Molecular Biology Lab., Interdisciplinary Biotechnology Unit, Aligarh Muslim University, Aligarh – 202 002, India.

**\*Corresponding author:** Prof. Asad U. Khan, Medical Microbiology and Molecular Biology Lab., Interdisciplinary Biotechnology Unit, Aligarh Muslim University, Aligarh – 202 002, UP, India. Ph.: 0091-9837021912, Fax: 0091-571-2721776

Email id: [asad.k@rediffmail.com](mailto:asad.k@rediffmail.com)

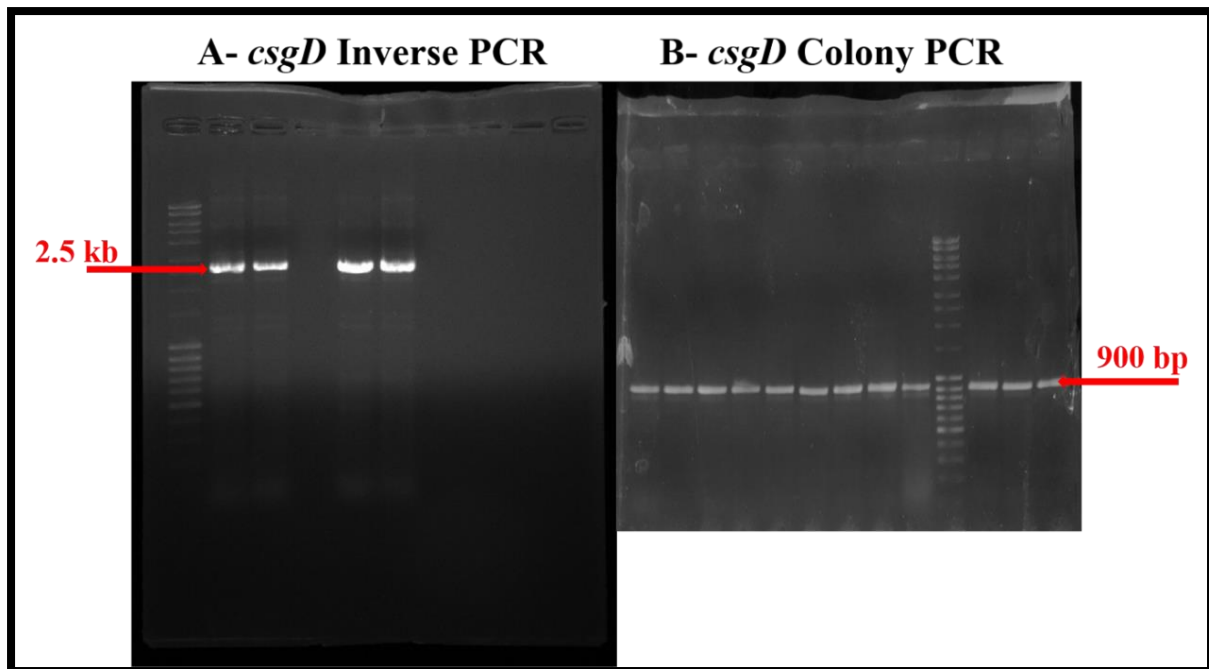

**Figure S1:** (A) Inverse PCR products are showing 2.5 kb sgRNA plasmid. (B) Colony PCR products of the clones with desired sgRNAs.

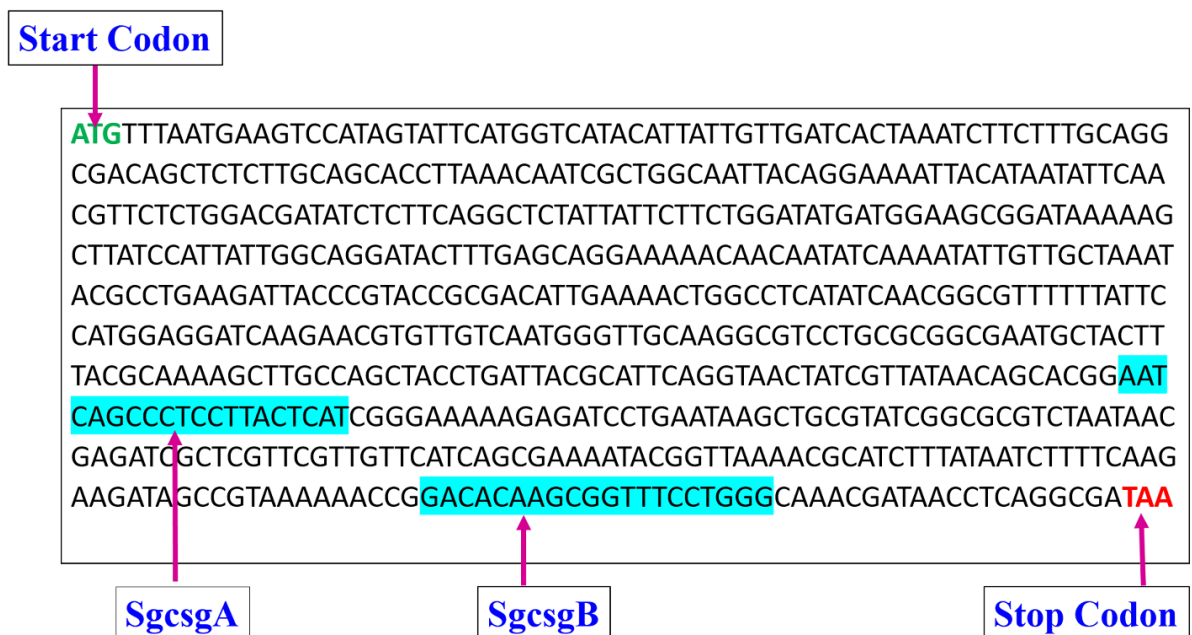

**Figure S2:** Showing the gene sequences and binding sites of SgcsgA and SgcsgB sgRNA sequences.

**Table S1:** List of the primers used in this study

| <b>Primer name</b> | <b>Sequences</b>                                            |
|--------------------|-------------------------------------------------------------|
| <b>SgcsG</b>       | CCCAGGAAACCGCTTGTGTCGTTTTAGAGCTAGAAATAGCAAGTT<br>AAAATAAGGC |
| <b>SgcsG</b>       | AATCAGCCCTCCTTACTCATGTTTTAGAGCTAGAAATAGCAAGTTA<br>AAATAAGGC |
| <b>SgcsG-R</b>     | ACTAGTATTATACCTAGGACTGAGCTAGC                               |
| <b>F-colony</b>    | GGGTTATTGTCTCATGAGCGGATACATATTTG                            |
| <b>R-colony</b>    | CGCGGCCTTTTTACGGTTC                                         |
| <b>Lux-RT-F</b>    | GTGTTTCGATCTGCGCTTCTG                                       |
| <b>Lux-RT-R</b>    | GGATCCCTCTTTCTGGCATCA                                       |
| <b>Bol-RT-F</b>    | CCAACCCGTATTCTCGAAGT                                        |
| <b>Bol-RT-R</b>    | GCCGGCTGGGACATTG                                            |
| <b>FimA RT-F</b>   | CCTGAATAACGGAACCAATACCA                                     |
| <b>FimA RT-R</b>   | GCCCCGGTTGCAAATAA                                           |
| <b>FimH RT-F</b>   | GATGCGGGCAACTCGATT                                          |
| <b>FimH RT-R</b>   | CGCCCTGTGCAGGTGAA                                           |
| <b>csgA-FW</b>     | GCGGTAATGGTGCAGATGTTG                                       |
| <b>csgA-RW</b>     | CGTTGGGTCAGATCGATTGA                                        |
| <b>csgB-FW</b>     | CGGCAGGGAGGCTCAA                                            |
| <b>csgB-RW</b>     | CCCGGTTGCTACTACCTTCTTG                                      |
| <b>csgD-FW</b>     | CGGAATCAGCCCTCCTTACTC                                       |
| <b>csgD-RW</b>     | GCGCCGATACGCAGCTTAT                                         |
| <b>ompR-RT-F</b>   | TGCCCGTGGTCGTGAATATT                                        |
| <b>ompR-RT-R</b>   | GCGAAATCTGCACGTCGAT                                         |
